# Supplementary material for: Diagnostic Error Rates and Associated Factors for Lower Gastrointestinal Perforation: A Multicenter Retrospective Cross-sectional Study
Source: Research Square preprint supplement (doi:10.21203/rs.3.rs-753657/v1), 2021-08-02
Supplement: Supplementary file 2 [file 0983997126e14474c912a95b.xlsx]

## Sheet: Sheet1
Multivariate logistic regression analysis	Odds Ratio [95%CI]	P value
Elderly (>65 years old)	0.79 [0.32-1.92]	0.597
Time for visit after 24h	1.05 [0.40-2.74]	0.928
Presence of fever	2.09 [0.90-4.83]	0.086
Absence of abdominal tenderness	3.27 [0.90-11.90]	0.071
Elevated C-reactive protein( above 10mg/L)	1.29 [0.44-3.78]	0.642
Night shift	1.16 [0.47-2.91]	0.747
First visit at teaching hospital	1.23 [0.46-3.25]	0.679
Unavailability of urgent radiology reports	3.15 [0.97-10.20]	0.056
First visit at clinic	2.45 [0.71-8.42]	0.156
Examined by a non-generalist	3.46 [1.13-10.60]	0.029
