# Supplementary material for: Diagnostic Error Rates and Associated Factors for Lower Gastrointestinal Perforation: A Multicenter Retrospective Cross-sectional Study
Source: Research Square preprint supplement (doi:10.21203/rs.3.rs-753657/v1), 2021-08-02
Supplement: Supplementary file 4 [file 0486fe9b1c955d5f83658e4a.xlsx]

## Sheet: Sheet1
List of wrong initial diagnosis (n=91)	cases
Gastroenteritis	27
Small bowel obstruction	13
Constipation	10
Diverticulitis	5
Appendicitis	3
Influenza	3
Ischemic colitis	2
Gastrointestinal bleeding	2
Intra-abdominal abscess	2
inguinal hernia	2
Musculoskeletal disease	2
Disturbance of consciousness	2
Others	18
