# Supplementary material for: Diagnostic Error Rates and Associated Factors for Lower Gastrointestinal Perforation: A Multicenter Retrospective Cross-sectional Study
Source: Research Square preprint supplement (doi:10.21203/rs.3.rs-753657/v1), 2021-08-02
Supplement: Supplementary file 5 [file 4514b9e29c962bb8d65a30fd.xlsx]

## Sheet: Sheet1
Characteristics	Timely diagnosis(n=301), Frequency (%)	Delayed Diagnosis(n=138), Frequency (%)	Odds Ratio [95%CI ]	P value
Patient Factor
Age,meadn (SD),y	73.1±13.2	70.3±15.3		P=0.047
Female, n(%)	139 (46.2)	66 (47.8)	1.165 [0.7786- 1.744]	P=0.758
Facility resident	29 (9.6)	7 (5.1)	0.501 [0.219-1.151]	P=0.134
Diabetes	48 (15.9)	15 (10.9)	0.643 [0.349-1.185]	P=0.188
Dementia	32 (10.6)	10 (7.2)	0.657 [0.318-1.36]	P=0.298
Bedridden	13 (4.3)	9 (6.5)	1.546 [0.659-3.627]	P=0.250
Psychiatric disorders	14 (4.7)	10 (7.2)	1.602 [0.707-3.632]	P=0.266
Chronic analgesic use	40 (13.3)	20 (14.5)	1.106 [0.623 -1.964]	P=0.765
Chronic antipsychotic use	20 (6.6)	12 (8.7)	1.338 [0.643-2.785]	P=0.435
Chronic laxative use	74 (24.6)	33 (23.9)	0.964 [0.603-1.541]	P=0.905
Use of immunosuppressive(including steroids)	43 (14.3)	16 (11.6)	0.787 [0.429-1.443]	P=0.547
Last-minute enemas	13 (4.3)	4 (2.9)	0.661 [0.223-1.967]	P=0.600
Age≧ 65	23 4(77.7)	100 (72.5)	0.753 [0.476-1.193]	P=0.231
Time for visit
Within 6 h	80 (26.6)	20 (14.5)	0.468 [0.275-0.799]	P=0.005
6-24h	58 (19.3)	21 (15.2)	0.752 [0.438-1.292]	P=0.350
More than 24h	89 (29.6)	55 (39.9)	1.578 [1.037-2.403]	P=0.038
Unclear	74 (24.6)	42 (30.4)	1.342 [0.859-2.096]	P=0.202
Disease factor
Presence of fever	132 (47.5)	76 (59.8)	1.648 [1.078-2.520]	P=0.024
Abdomonal pain	260 (90.3)	117 (90.0)	0.969 [0.489-1.917]	P=1.000
Acute pain	165 (72.7)	58 (65.9)	0.726 [0.429-1.229]	P=0.270
Absence of abdominal tenderness	20 (7.1)	22 (17.5)	2.761 [1.457-5.232]	P=0.002
Elevated C-reactive protein( above 10mg/L)	198 (72.8)	83 (88.3)	2.820 [1.438-5.523]	P=0.002
Perforation by a foreign body.	16 (5.3)	8 (6.3)	1.188 [0.507-2.788]	P=0.654
Site of perfration
Rectum	28 (9.3)	13 (9.4)	1.014 [0.514-2.004]	P=1.000
Sigmoid colon	140 (46.5)	60 (43.5)	0.885 [0.590-1.326]	P=0.606
Descending colon	18 (18.6)	8 (5.8)	0.968 [0.419-2.237]	P=1.000
Transverse colon	10 (3.3)	1 (0.7)	0.212 [0.035-1.305]	P=0.185
Ascending colon	19 (6.3)	6 (4.3)	0.675 [0.271-1.682]	P=0.509
Cecum	4 (1.3)	5 (3.6)	2.791 [0.798-9.758]	P=0.147
Small bowel	73 (24.3)	43 (31.2)	1.414 [0.906-2.206]	P=0.131
Difficult to identify the detailed area	9 (3.0)	2 (1.4)	0.477 [0.115-1.991]	P=0.515
Situational factor
Night shift	89 (38.4)	31 (25.8)	0.560 [0.345-0.909]	P=0.024
First visit at teaching hospital	194 (64.5)	54 (39.1)	0.355 [0.234-0.537]	P<0.001
First visit at large hospital(more than 400 beds)	115 (38.2)	26 (18.8)	0.375 [0.232-0.609]	P<0.001
First visit at small hospital(less than 400 beds)	153 (50.8)	66 (47.8)	0.887 [0.593-1.326]	P=0.608
First visit at clinic	33 (11.0)	46 (33.3)	4.061 [2.455-6.717]	P<0.001
Unavailability of urgent radiology reports	206 (68.4)	115 (83.3)	2.306 [1.390-3.823]	P=0.001
Clinic or hospital	43 (14.3)	46 (33.3)	3.000 [1.862-4.834]	P<0.001
Gastroenterologist's consultation at first visit	64 (21.3)	35 (25.4)	1.258 [0.786-2.014]	P=0.389
Emergency phycisian's consulation at first visit	53 (17.6)	5 (3.6)	0.176 [0.071-0.438]	P<0.001
General phycisian's consulation at first visit	27 (9.0)	3 (2.2)	0.226 [0.072-0.713]	P=0.007
Other physician's consultation af first visit	106 (35.2)	56 (40.6)	1.256 [0.831-1.899]	P=0.288
Unknown's consulation at first visit	51 (17.0)	39 (28.3)	1.931 [1.201-3.107]	P=0.008
Examined by a non-generalist(other than general phycisian and emergency physician)	221 (73.4)	130 (94.2)	5.882 [2.796-12.356]	P<0.001
